# Supplementary material for: KAP Degradation by Calpain Is Associated with CK2 Phosphorylation and Provides a Novel Mechanism for Cyclosporine A-Induced Proximal Tubule Injury
Source: PubMed Central journal article supplement (PMC3182248; doi:10.1371/journal.pone.0025746), 2011-09-28
Supplement: pone.0025746.s001.pdf [file pone.0025746.s001.pdf]

Table S1: Percent change of functional parameters in each group in respect to vehicle.

|                                |                | BUN % change   | Sc % change    |
|--------------------------------|----------------|----------------|----------------|
| Standard diet<br>28d treatment | Littermate-VH  | 100 ± 19,95    | 100 ± 12,36    |
|                                | Littermate-CsA | 105 ± 27,71    | 96,51 ± 10,33  |
|                                | KAP Tg-VH      | 100 ± 12,77    | 100 ± 11,48    |
|                                | KAP Tg-CsA     | 110,11 ± 48,38 | 104,51 ± 16,23 |
| Low salt diet<br>21d treatment | Littermate-VH  | 100 ± 29,04    | 100 ± 2,95     |
|                                | Littermate-CsA | 103,79 ± 54,08 | 100,46 ± 8,66  |
|                                | KAP Tg-VH      | 100 ± 24,82    | 100 ± 9,19     |
|                                | KAP Tg-CsA     | 102,40 ± 44,91 | 93,18 ± 17,72  |

Data are mean percent change ± SD of six animals. VH, vehicle; CsA, cyclosporine A; BUN, blood urea nitrogen; Scr, serum creatinine.
